# Supplementary material for: Exploring the Aerosol Activation Properties in a Coastal Area Using Cloud and Particle-resolving Models
Source: Copernicus journal article supplement (doi:10.5194/egusphere-2024-3581), 2024-12-02
Supplement: Supplementary file [file egusphere-2024-3581-AC1-supplement.pdf]

## Response to Referee 1

Thank you for your constructive comments and suggestions. Following the comments we revised the manuscript and improved its contents, structure, and quality. Below are our responses to the your comments. The text in black is the original comments from you, and our **responses** are the **text in blue**. Some text from the revised manuscript is quoted in this response letter for the reviewer's convenience, and the *quoted text* is in *italic font*. The **line numbers** mentioned below are those in the revised PDF file, where the modification can be identified.

### Referee 1:

This study uses the Cloud Model 1 (CM1) and the PartMC-MOSAIC model to simulate air parcel movement and aerosol evolution under shallow convection in coastal regions. The study concludes that transitioning from the boundary layer to the free atmosphere significantly affects aerosol properties, particularly through the rapid formation of ammonium nitrate, which increases the aerosols' cloud-forming potential. Additionally, the study highlights the importance of detailed aerosol mixing state representation for calculating CCN activity.

The premise of the paper, namely investigating aerosol aging processes as a function of altitude in the atmosphere, is interesting, as are the combination of tools (a cloud resolving model and a particle-resolved aerosol model). However, I have concerns about the setup of the simulations, about the novelty of the study, and about the generalization of the results. These need to be addressed before the paper can be considered for publication in ACP.

### Detailed comments are as follows:

1. Simulation setup: There seems to be a mismatch between the PartMC-MOSAIC box model simulations and the way these are combined with the CM1 simulations. The authors use the scenario from Riemer et al. (2009), which was designed to represent the well-mixed boundary layer in a polluted urban region during the day (emissions are added to the simulation), and the residual layer during the night (no emissions added). The CM1 simulations on the other hand provide temperature, pressure, etc., of a particular parcel. If the CM1 simulations are used to drive the PartMC simulations, the authors need to think carefully about how emissions are added to the parcel. Specifically, once the parcel leaves the surface, no emissions should be added (i.e., even before it reaches the free troposphere), but mixing with the environment should potentially be considered.

Thank you for your detailed suggestions. We may not explain clearly in the initial methodology section. The utilization of Riemer's scenario primarily involves the distribution data of emission aerosols and gases. However, the emission temporal profiles have been adjusted based on our different parcels. Specifically, the parcel at the surface will continuously be affected by emitted substances, whereas parcels ascending from the surface have their emission sources closed upon departure (as you mentioned, no emissions), and

this ascent process is also very rapid, completed within 10 minutes in PartMC.

Regarding the second point on the mixing with environmental substances, your considerations are very thorough. We indeed took note of this dilution process. For ascending parcels, we have adjusted the horizontal diffusion coefficient in the PartMC model (based on results from CM1) and set different background aerosol and gas concentrations at high altitudes. The conversion of gas and aerosol substances at high altitudes will be explained specifically under the ninth comment.

We have modified the method section to make the description clear, relevant part is pasted below (lines 125~128, 141~146):

*“After updraft, the temperature rapidly dropped to 17 °C (290 K) and the pressure became 880 hPa, corresponding to approximately 1.2 km altitude. As the parcel ascended and remained at a high altitude, the emission from ground sources ceased to enter these parcels.”*

*“Subsequently, we converted the data and generated the high-altitude background aerosol used in the simulation. The substances in the ascent parcels would dilute with high-altitude background aerosols and gases. Detailed information on the number concentration and size distribution of the aerosols in different modes can be found in Table 2. The initial aerosol conditions in the parcels contain three modes that are the same as the Ground part because all the parcels stay near the surface during the initialization period. The background concentrations for ground-level and high-altitude gases are listed in Supplementary Information S5.”*

2. Novelty: Ching et al. (2017, ACP, 17, 7445-7458) have investigated mixing state impacts on CCN activity in great detail. Granted, they did not use CM1 to construct trajectories to drive PartMC. However, at the end of the day, what do we learn from your study that is new and unique compared to Ching et al. (2017)?

Thanks for your question. This study was indeed inspired by the work of Ching et al. (2017, ACP, 17, 7445-7458), which provided a quantitative explanation of the relationship between mixing state and errors in CCN concentrations. Their work offered valuable insights into the analysis of aerosol mixing states and their impact on CCN activity. However, our study introduces several unique and innovative aspects.

Currently, numerous large-scale meteorological simulations employ relatively simple aerosol parameterization methods when considering the contribution of CCN to cloud microphysical processes, such as directly prescribing aerosol activation rates. These simplifications may introduce significant errors in the prediction of cloud behavior and associated atmospheric processes. This study integrates the meteorological model CM1 with the aerosol evolution model PartMC for the first time. By leveraging CM1, we derived the motion characteristics of air parcels in a coastal area and analyzed the evolution of aerosols from a particle-resolved perspective during parcel transport. This combined approach has built a framework on the aerosol simulations considering the meteorological condition. Although this study

focuses on a smaller scale compared to typical meteorological simulations, it lays an important foundation for improving CCN parameterization schemes in large-scale models.

In addition, although PartMC has been extensively applied in previous studies, these studies primarily focused on parcels within the boundary layer. In contrast, this work includes the ascent of parcels into the free troposphere due to meteorological influences, where cloud formation occurs. During this ascent, the environmental conditions of the parcels undergo significant changes (e.g., temperature, pressure, and surrounding gas), which in turn affect aerosol evolution and CCN activation. This aspect is one of the main contributions of our work, as it evaluates aerosol hygroscopicity and cloud-forming potential under realistic cloud-forming conditions.

Besides, this paper reveals that not only the updraft of parcels but also the timing of their ascent will influence the aerosol evolution. The factors affecting aerosol aging processes, including chemical composition, particle size, mixing state and their impact on CCN activation are quantified through systematic analysis of four typical scenarios. The advantages of the particle-resolved model over the composition-averaged method are compared and identified.

We accordingly revised the manuscript and now the novelty mentioned in the introduction section is as follows:

*“Although the PartMC-MOSAIC has been extensively applied in previous studies, these studies primarily focused on parcels within the boundary layer, this may limit the accurate representation of environmental conditions when studying the cloud-forming ability of aerosols. Compared to the work mentioned above, Curtis et al. (2017) noted that PartMC, as a zero-dimensional box model, lacks spatial information and has not been integrated into meteorological studies. To address this, they pioneered the coupling of WRF with PartMC, resolving aerosol composition on a per-particle level and integrating aerosol chemistry with meteorology. This represents one of the few studies to combine meteorological modeling with PartMC, which reveals the potential of PartMC in studying aerosol vertical transport. Building on this foundation, our study further explores the application of meteorological simulations coupled with PartMC, advancing the understanding of this approach in aerosol research.*

*Currently, large-scale meteorological simulations generally employ relatively simple aerosol parameterization methods when considering the contribution of CCN to cloud microphysical processes (Hazra et al., 2020; Morrison and Milbrandt, 2011; Thompson and Eidhammer, 2014), such as directly prescribing aerosol activation rates. These simplifications may introduce errors in the prediction of cloud behavior and associated atmospheric processes. To this end, this study integrates the meteorological Cloud Model 1 (CM1) (Bryan and Fritsch, 2002) with the aerosol evolution model PartMC for the first time.”*

3. Figure S1 shows cloud water/ice mixing ratios. Is it cloud water or ice? Are the aerosols interacting with the existing clouds in any way? I assume they don't. What does this mean for the realism of the aerosol simulations? This deserves some discussion. I also noticed that the cloud water mixing ratios are quite small. Could the authors comment on this?

The plot you mentioned in Figure S1 displays the combination mixing ratio of cloud water and ice. Based on this question, we clarified it in the caption for Figure S1 in the new supplementary (lines 5 ~ 6). Figure S1 and the modified caption are pasted below:

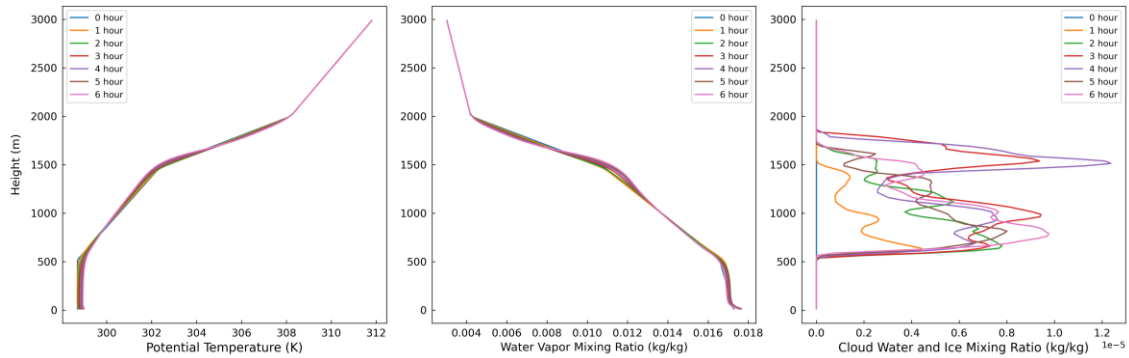

**Figure S1. The temporal changes of the potential temperature, water vapor mixing ratio, and cloud water and ice mixing ratio with the height in the preliminary CM1 experiment. The results shown in the figures are the average values on the horizontal plane.**

Yes, as you mentioned, our aerosol simulation does not involve interactions with clouds. Thank you for your suggestion, and we have added some explanations in the new supplementary section (lines 16 ~ 18):

*“The presentation of this plot is to illustrate the potential cloud formation heights under the typical shallow cumulus convection conditions. This also highlights the significance of scenario design in our study. We aim to obtain air parcels at corresponding heights where clouds can form to assess the aerosol evolution processes and the particles' cloud-forming potential.”*

Regarding the issue of "the cloud water mixing ratios are quite small," this is because the values presented are averaged mixing ratios on the horizontal plane (x-y plane). We have added some descriptions in the caption (line 6) and we appreciate your attention to detail. Since clouds only form in the middle regions of a plane at a specific height, the surrounding blank regions lower the average cloud-water mixing ratio at that height. Therefore, the results presented show relatively small values.

4. Since the paper is about CCN properties in a coastal area, I would assume that there should be sea spray aerosol, however the paper mentions that sodium chloride concentrations are very small. Please explain.

Thank you for your meticulous review. The aerosol data we employed were derived from observations conducted at the station in Tsuen Wan, Hong Kong (Wang et al., 2017). The measurement site is not directly adjacent to the coast and larger sea salt particles typically do not disperse over large distances

from the coastline. Consequently, the observed data and our initial inputs encompass relatively lower levels of sodium chloride than in marine environments.

The initial aerosol data we utilized, from the summer averages, represent the background aerosols in coastal urban areas such as Hong Kong. These initial conditions, also being background aerosols, impact the final simulated concentrations of NaCl.

Moreover, our objective is to establish a framework through idealized simulations. The selected setting for these simulations is a coastal area, primarily due to the tendency for clouds to form at relatively low altitudes. Shallow cumulus convection conditions are common in these areas. The framework in this work will enable future researchers to input aerosol and gas emission profiles tailored to their specific areas of interest (e.g., adjustments for scenarios with high sea salt content), facilitating the achievement of results that better align with new research needs.

5. The nitrate concentrations are very high. Please provide some context where (in the world) such high nitrate concentrations could be encountered. How generalizable are these results? It would be helpful to have simulations with lower nitrate levels.

Thank you for your question. We have sourced the background nitrate data from the Hong Kong observation station (Wang et al., 2017). Through the confirmation, we found that the measurements reported by Wang and Yu (2017) were conducted during 2013~2014. The observational data is approximately one decade old, during which nitrate pollution levels were substantially higher than present conditions. In our study, the total background nitrate concentration (summing condensation, droplet, and coarse modes) was set at  $1.20 \mu\text{g}/\text{m}^3$  for summer conditions.

During the observation period, nitrate pollution in China was particularly severe. Several studies from that time report nitrate concentrations comparable to the values used in our study. For instance, Figure 5 in Elser et al. (2016) presents reference diurnal trends of PM<sub>2.5</sub> components (excluding extreme haze events) observed during 2013–2014, showing nitrate concentrations reaching approximately  $10 \mu\text{g}/\text{m}^3$  in Xi'an and Beijing.

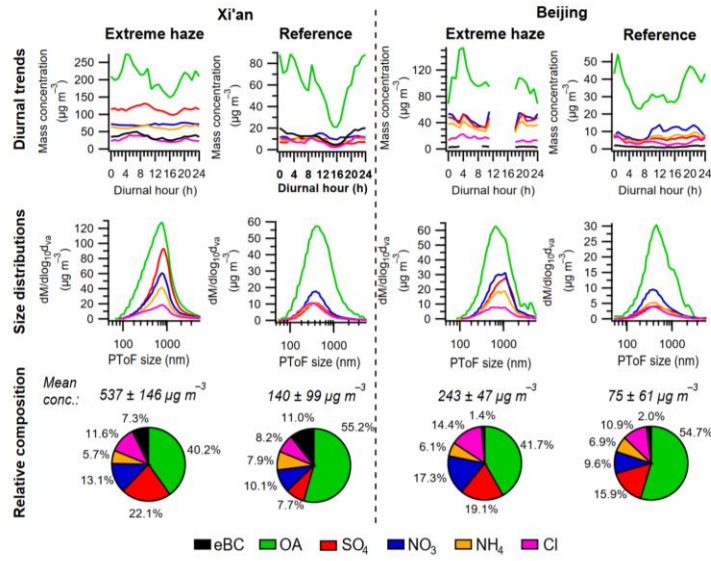

**Figure 5.** Diurnal trends, size distributions, mean concentrations (NR-PM<sub>2.5</sub> plus eBC mass) and relative contributions of the AMS species and eBC for the four periods. Note: size distributions only available for AMS species.

Additionally, Figure 1 in Zhai et al. (2021) summarizes annual mean nitrate concentrations in PM<sub>2.5</sub> across China during 2013–2015, with some coastal regions exceeding 10 μg/m<sup>3</sup>.

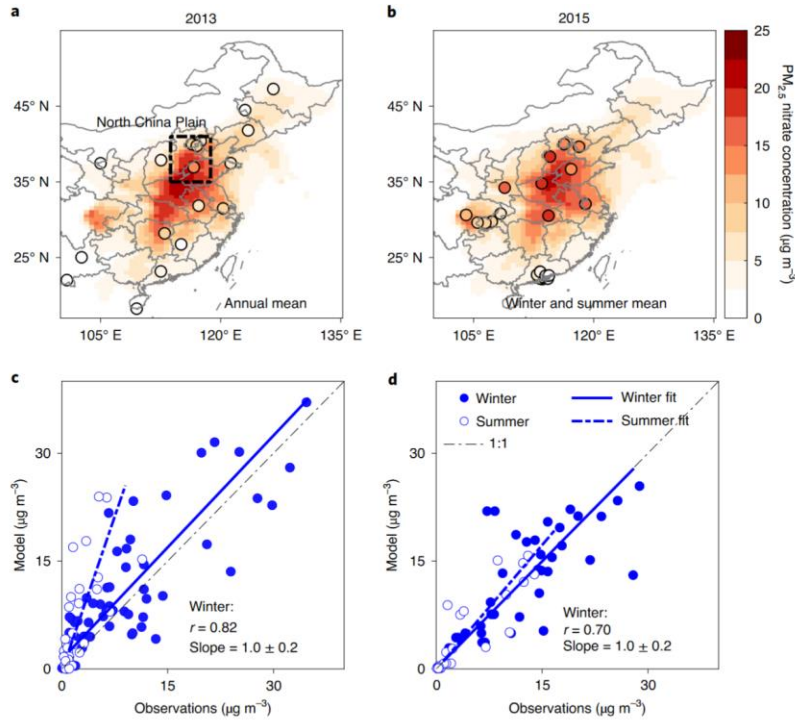

**Fig. 1 | PM<sub>2.5</sub> nitrate concentrations in China and comparisons between observations and GEOS-Chem model results.** **a,b**, Surface air PM<sub>2.5</sub> nitrate concentrations from two nationwide datasets (circles) and GEOS-Chem (background) for 2013 (**a**, annual mean) and 2015 (**b**, summer and winter mean). The colour bar shows PM<sub>2.5</sub> nitrate concentration in μg m<sup>-3</sup>. **c,d**, Scatterplots of observed and modelled winter (filled circles) and summer (open circles) monthly mean (seasonal mean for the 2015 dataset) nitrate at individual sites. Also shown in **c** and **d** are the 1:1 lines, the wintertime correlation coefficients (*r*) between model and observations, and the corresponding reduced-major-axis regressions and slopes (±95% confidence interval). The 2013 dataset is from the Campaign on Atmospheric Aerosol Research network of China (CARE-China), with nitrate measured by ion chromatography<sup>36,48</sup>. The 2015 dataset is from ref. <sup>37</sup>, and only includes sites that have both winter and summer observations. The dashed rectangle in **a** delineates the North China Plain region as defined in this paper (113.75°–118.75° E, 35°–41° N).

We adopted the Hong Kong observational data for parcel initialization and background conditions because it provides comprehensive aerosol speciation that meets our model's input requirements. The subsequent nitrate increase in basic Scenario A relates to urban background ammonia and nitric acid concentrations



specified in emission inventories. Photochemical processes drive ozone production and NO<sub>x</sub> oxidation, leading to rapid daytime nitrate accumulation with limited dispersion. Actual nitrate removal mechanisms (including dispersion and deposition) are strongly influenced by meteorological conditions (Zhai et al., 2021), which are not currently represented in our 0D PartMC-MOSAIC model.

The elevated nitrate concentrations observed in parcels after ascent result from complex interactions between rapid environmental changes and background substances. Nitrate aerosols exhibit strong temperature sensitivity. Gas-particle partitioning occurs within parcels experiencing significant temperature fluctuations. These results represent nitrate levels within localized air parcels rather than ambient atmospheric concentrations at equivalent altitudes.

The current simulations aim to establish a framework, which is applicable to various scenarios and background substance data, including lower nitrate concentrations. We have carefully considered the reviewer's concerns and added explanations regarding our data selection in the revised manuscript. For reviewers' reference, we have added the following clarification in lines 141~142:

*“The nitrate levels observed in Hong Kong (used in this study) may be higher than other coastal cities due to historical pollution patterns from a decade ago, but the methodology can be adapted to incorporate different observational data from other regions.”*

References for nitrate concentration:

- Elser, M., Huang, R.-J., Wolf, R., Slowik, J. G., Wang, Q., Canonaco, F., Li, G., Bozzetti, C., Daellenbach, K. R., Huang, Y., Zhang, R., Li, Z., Cao, J., Baltensperger, U., El-Haddad, I., & Prévôt, A. S. H. (2016). New insights into PM<sub>2.5</sub> chemical composition and sources in two major cities in China during extreme haze events using aerosol mass spectrometry. *Atmospheric Chemistry and Physics*, 16(5), 3207–3225. <https://doi.org/10.5194/acp-16-3207-2016>
- Zhai, S., Jacob, D. J., Wang, X., Liu, Z., Wen, T., Shah, V., Li, K., Moch, J. M., Bates, K. H., Song, S., Shen, L., Zhang, Y., Luo, G., Yu, F., Sun, Y., Wang, L., Qi, M., Tao, J., Gui, K., ... Liao, H. (2021). Control of particulate nitrate air pollution in China. *Nature Geoscience*, 14(6), 389–395. <https://doi.org/10.1038/s41561-021-00726-z>

6. Please add more information about the individual trajectories. What are the temperatures (what range is covered between the different trajectories), what is the RH (range?), and what are the gas phase concentrations?

Thank you for your suggestion. We have conducted extraction and analysis of key variables (air temperature and relative humidity) associated with CM1-tracked parcels, with the compiled data systematically organized in Table R1.

**Table R1. The range of temperature and RH in the parcels of CM1 simulation.**

| Conditions              | Temperature range (K) | RH range (%) |
|-------------------------|-----------------------|--------------|
| Ascent parcels          | 287 - 300             | 57 - 100     |
| All the tracked parcels | 287 - 300             | 57 - 100     |

Utilizing CM1 output, we implement scenario-specific temperature variations in PartMC simulations. The data is extracted from representative parcels. In different trajectories, the parcel temperature at ground level is set as 299 K and at elevated altitude as 290 K. Due to the characteristics of the PartMC model, we first set the initial relative humidity to 60%, which increases to 92% after the parcel ascends based on temperature changes. We have revised the relevant descriptions in the method section. The revised content is now in lines 123~128:

*“For the parcels that stay at the surface, the background temperature was set to 26 °C (299 K), and the pressure was set to the standard atmospheric pressure. After updraft, the temperature rapidly dropped to 17 °C (290 K) and the pressure became 880 hPa, corresponding to approximately 1.2 km altitude. As the parcel ascended and remained at a high altitude, the emission from ground sources ceased to enter these parcels. To align with the humidity conditions of ascending parcels in CM1, the initial relative humidity was set to 60%. Environmental parameter configurations for different scenarios are listed in Table 1.”*

**Table 1. Fundamental settings for 4 different scenarios.**

| Scenario | Ascent<br>Timing<br>(hr) | Temperature<br>before Ascent<br>(K) | Temperature<br>after Ascent<br>(K) | Pressure<br>before Ascent<br>(hPa) | Pressure<br>after Ascent<br>(hPa) | Initial Relative<br>Humidity<br>(%) |
|----------|--------------------------|-------------------------------------|------------------------------------|------------------------------------|-----------------------------------|-------------------------------------|
| A        | -                        | 299                                 | -                                  | 1000                               | -                                 | 60                                  |
| B        | 2                        | 299                                 | 290                                | 1000                               | 880                               | 60                                  |
| C        | 6                        | 299                                 | 290                                | 1000                               | 880                               | 60                                  |
| D        | 10                       | 299                                 | 290                                | 1000                               | 880                               | 60                                  |

Initial gas concentrations were consistent with surface background levels and evolved dynamically throughout temporal development. The simulation ranges for gas concentrations are tabulated below and have been appended to Supplementary Section S5. The supplemental additions include:

**Table S1. The Background Conditions and Emissions for Gases**

| Gas Species | Symbol | Ground Fraction<br>(ppb) | Emissions<br>(nmol m <sup>2</sup> s <sup>-1</sup> ) | High-altitude Fraction<br>(ppb) |
|-------------|--------|--------------------------|-----------------------------------------------------|---------------------------------|
|-------------|--------|--------------------------|-----------------------------------------------------|---------------------------------|



|                         |                               |         |       |           |
|-------------------------|-------------------------------|---------|-------|-----------|
| Nitric oxide            | NO                            | 0.1     | 31.8  | 0.091     |
| Nitrogen dioxide        | NO <sub>2</sub>               | 1.0     | 1.67  | 0.91      |
| Nitric acid             | HNO <sub>3</sub>              | 1.0     |       | 0.91      |
| Ozone                   | O <sub>3</sub>                | 50.0    |       | 45.5      |
| Hydrogen peroxide       | H <sub>2</sub> O <sub>2</sub> | 1.1     |       | 1.001     |
| Carbon monoxide         | CO                            | 21.0    | 291.3 | 19.11     |
| Sulfur dioxide          | SO <sub>2</sub>               | 0.8     | 2.51  | 0.728     |
| Ammonia                 | NH <sub>3</sub>               | 0.5     | 6.11  | 0.455     |
| Hydrogen chloride       | HCl                           | 0.7     |       | 0.637     |
| Methane                 | CH <sub>4</sub>               | 2200.0  |       | 2002      |
| Ethane                  | C <sub>2</sub> H <sub>6</sub> | 1.0     |       | 0.91      |
| Formaldehyde            | HCHO                          | 1.2     | 1.68  | 1.092     |
| Methanol                | CH <sub>3</sub> OH            | 0.12    | 0.28  | 0.1092    |
| Methyl hydroperoxide    | CH <sub>3</sub> OOH           | 0.5     |       | 0.455     |
| Acetaldehyde            | ALD <sub>2</sub>              | 1.0     | 0.68  | 0.91      |
| Paraffin carbon         | PAR                           | 2.0     | 96.0  | 1.82      |
| Acetone                 | AONE                          | 1.0     | 1.23  | 0.91      |
| Ethene                  | ETH                           | 0.2     | 7.2   | 0.182     |
| Terminal olefin carbons | OLET                          | 0.023   | 2.42  | 0.02093   |
| Internal olefin carbons | OLEI                          | 0.00031 | 2.42  | 0.0002821 |
| Toluene                 | TOL                           | 0.1     | 4.04  | 0.091     |
| Xylene                  | XYL                           | 0.1     | 2.41  | 0.091     |
| Lumped organic nitrate  | ONIT                          | 0.1     |       | 0.091     |
| Peroxyacetyl nitrate    | PAN                           | 0.8     |       | 0.728     |
| Higher organic acid     | RCOOH                         | 0.2     |       | 0.182     |
| Higher organic peroxide | ROOH                          | 0.025   |       | 0.02275   |
| Isoprene                | ISOP                          | 0.5     | 0.23  | 0.455     |
| Alcohols                | ANOL                          |         | 3.45  | 0.091     |

*“The gaseous species inputs across all simulation scenarios are systematically cataloged in Table S1. These chemical species align with those documented in Zaveri and Peter (1999), while surface*

*background concentrations and emission parameters were adopted from Riemer et al. (2009). For elevated atmospheric conditions, we implemented the ideal gas Clapeyron equation with the following boundary conditions:*

*High altitude: 880 hPa, 290 K*

*Ground level: 1000 hPa, 299 K*

*These conditions enabled the derivation of trace gas concentrations at the high altitude of the ascent parcels. Emission rates presented in the table represent temporal averages over emission periods, with actual rates subject to modulation by mixing height variations (Riemer et al., 2009a)."*

7. The first two paragraphs of the introduction are too generic. I recommend that the authors get to the point more quickly – how mixing state impacts CCN properties, what is known about this, and what the novel contribution of this paper is. Additionally, the references for some statements are not well chosen, e.g., Mishra et al., (2023), Curtis et al. (2017), Lolli et al. (2023). Please carefully check to make sure that each reference really supports the statement made.

Thank you for your highly practical suggestions. We have restructured the first two paragraphs by merging them into a single paragraph to enable a quicker transition into the main topic. In the second paragraph, we directly introduced the theme of the mixing state's impact on CCN. The second paragraph of the revised introduction is as follows:

*"The mixing state indicates the chemical composition distribution among aerosol particles, the treatment of which represents a crucial aspect in investigating aerosol aging processes and CCN activation properties. There are two ideal extremes of the mixing state: internally mixed and externally mixed (Winkler, 1973) commonly applied as simplified assumptions. The former assumes that each particle shares the same chemical composition, while the latter considers that each individual particle contains distinct species. In aerosol research, Riemer introduced the use of the mixing state index to quantitatively assess the degree of mixing state (Riemer and West, 2013). Subsequently, Ching et al. provides a detailed explanation of the impact of mixing state on CCN properties. They proved that simplifying assumptions about mixing state will cause inevitable errors due to the loss of particle size information (Ching et al., 2017). However, such simplifications regarding the mixing state remain inevitable, especially in experimental research and large-scale simulations."*

Additionally, we have double-checked and ensured the citation of each reference to better support the statements. We greatly appreciate your attention to this issue. The work by Curtis et al. has now been cited in the section discussing PartMC-related studies (lines 74~78).

8. The authors refer with “kappa” somewhat loosely to both a population-level “bulk” kappa and to a per-particle kappa. It would be helpful if the authors could clearly explain early on (using appropriate notation) that aerosol particles should be described by a distribution of kappa values, just like they are described by a distribution of sizes. From there we can average within size ranges or within the whole population to arrive at an average kappa for the population

Your suggestion helps to clarify our article. We have incorporated some descriptions into the original text of the methodology section (lines 181~185):

*“For the particle  $i$  containing various components,  $\kappa_i$  is the volume-weighted average of the  $\kappa$  values of its constituent aerosol species. For the aerosol population, the median value  $\kappa_m$  of all  $\kappa_i$  values is calculated to serve as a characteristic parameter of the ensemble hygroscopicity, which is analyzed in Section 3. Table 3 lists specific  $\kappa$  values assigned to different species simulated in this study (Clegg et al., 1998; Riemer et al., 2009b; Zaveri et al., 2010).”*

Correspondingly, we have revised the Figure 2 caption and  $\kappa$ -related descriptions in the Results section. The manuscript now systematically employs  $\kappa_i$  for per-particle hygroscopicity parameters,  $\kappa_m$  for population-level median values, and  $\kappa$  (without subscript) to denote the characteristic hygroscopicity of sub-populations. The revised caption for Figure 2 is pasted below:

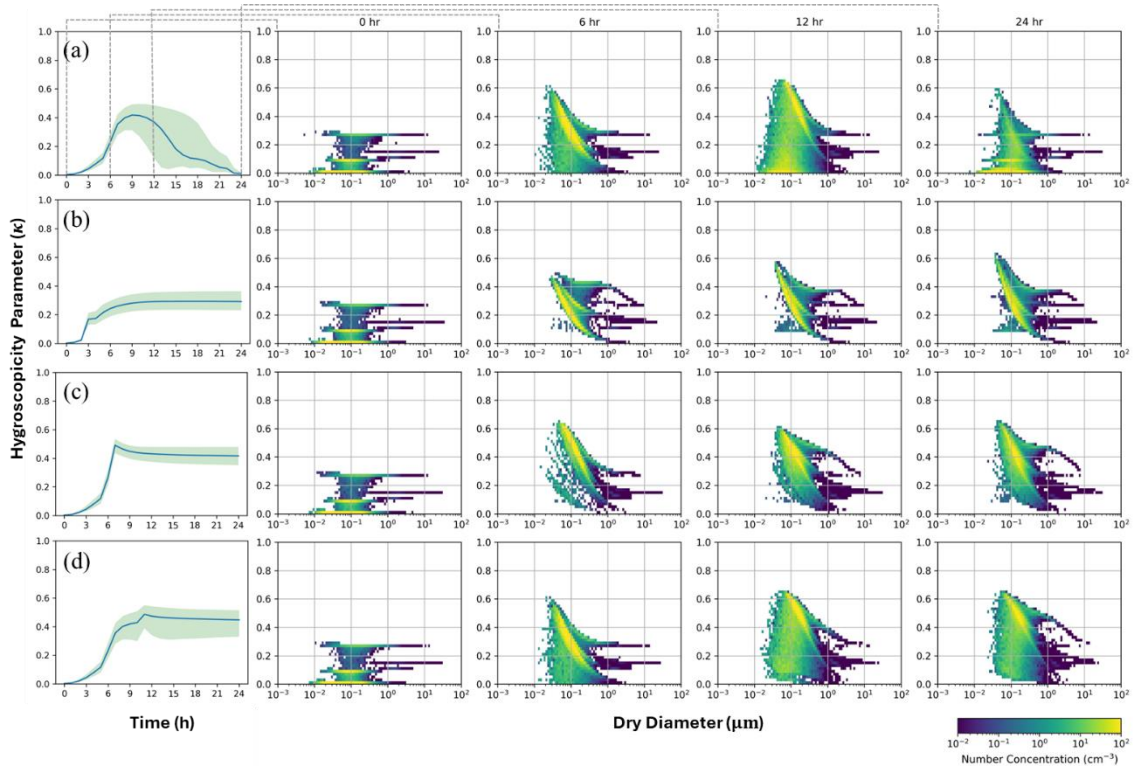

**Figure 2.** The median hygroscopicity parameter  $\kappa_m$  changes over time and the number concentration distribution of the particles with different  $\kappa_i$  values across particle size at 0, 6, 12, and 24 hours in (a) Scenario A, (b) Scenario B, (c) Scenario C, and (d) Scenario D. The blue solid line in the left plots represents the median  $\kappa$  across the aerosol population, while the edges of the green shading denote the 25th and 75th percentile  $\kappa_i$  values.

9. Line 142: How was the conversion to high-altitude background aerosol data done?

Thank you for your careful consideration of these details. The data conversion methodology applies ground-based measurements (Wang et al., 2017) and three-dimensional aerosol reanalysis data from MERRA-2 (the Modern-Era Retrospective Analysis for Research and Applications, Version 2).

The observation data contains total mass concentrations of various aerosol species along with their multimodal size distribution parameters. The employed MERRA-2 data (M2I3NVAER, DOI: 10.5067/LTVB4GPCOTK2) features instantaneous 3D fields with 3-hourly temporal resolution, vertically resolved into 72 atmospheric layers (layer 72 corresponds to the surface at 1000 hPa). The aerosol components include sulfate, black carbon, organic carbon, and sea salt, maintaining consistency with the observational species.

We extracted MERRA-2 aerosol data for the Hong Kong region (113.9°E-114.6°E, 22.2°N-22.5°N) using its native  $0.625^\circ$  longitude  $\times$   $0.5^\circ$  latitude grid. The data of the lowest 20 atmospheric layers (from 880 to 1000 hPa) in summer (June to August) was extracted and processed. Subsequent calculations determined the mass concentrations of different species at 880 hPa (the high-altitude background aerosol) through vertical proportionality relationships between surface (1000 hPa) and target altitude. To meet PartMC's requirement for aerosol inputs, we converted the data and generated the high-altitude background aerosol data used in simulations.

We have accordingly updated the methodology section (Section 2.1) in the revised manuscript to elaborate these technical procedures with enhanced clarity (lines 138~144):

*“We extracted the reanalysis aerosol data of Modern-Era Retrospective Analysis for Research and Applications, Version 2 (MERRA-2, DOI: 10.5067/LTVB4GPCOTK2) in the Hong Kong region. The data of the lowest atmospheric layers (from 880 to 1000 hPa) in summer was processed and the vertical proportionality relationships between the ground-level aerosol species and high-altitude species were estimated. Subsequently, we converted the data and generated the high-altitude background aerosol used in the simulation. The substances in the ascent parcels would dilute with high-altitude background aerosols and gases. Detailed information on the number concentration and size distribution of the aerosols in different modes can be found in Table 2.”*

New added references:

Global Modeling and Assimilation Office (GMAO) (2015), inst3\_3d\_aer\_Nv: MERRA-2 3d,3-Hourly, Instantaneous, Model-Level, Assimilation, Aerosol Mixing Ratio, version 5.12.4, Greenbelt, MD, USA: Goddard Space Flight Center Distributed Active Archive Center (GSFC DAAC), Accessed Enter User Data Access Date at doi: 10.5067/LTVB4GPCOTK2. Retrieved from <https://gmao.gsfc.nasa.gov/reanalysis/MERRA-2/>.

10. Figure 1: To help the reader, in the caption please repeat what cases A, B, C, D are.

Thank you for your suggestion. We have added brief descriptions for the four different cases in the caption of Figure 1. This can be found in lines 201~202 of the revised manuscript.

Additionally, we have modified the images to make the various substances more distinct and friendly to readers with color vision deficiencies. The new figure and caption are pasted below:

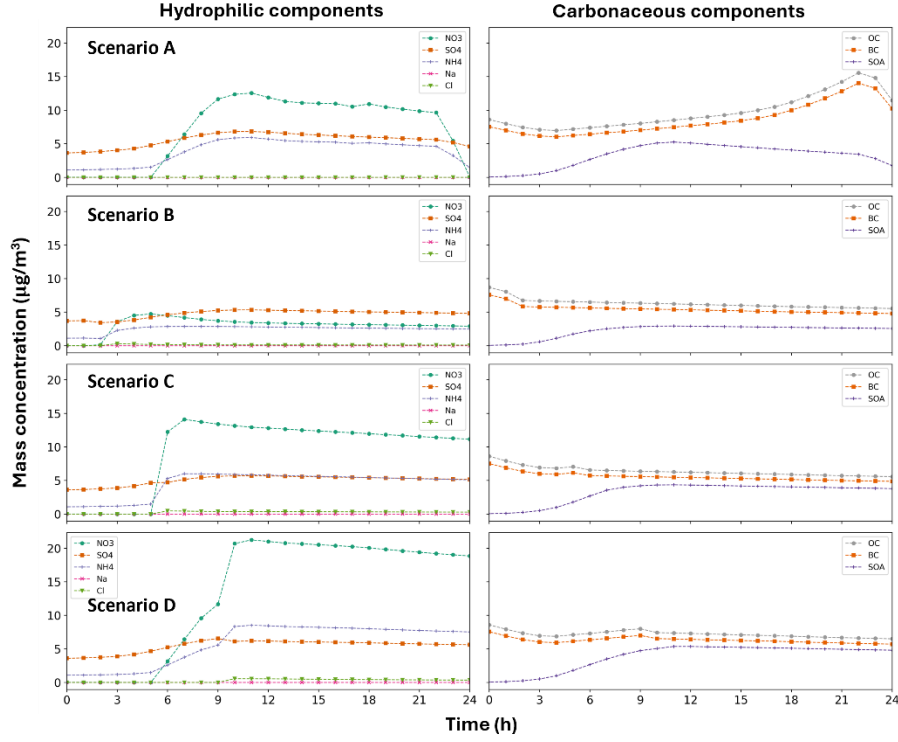

**Figure 1. Mass concentration variations over time of hydrophilic and carbonaceous components in Scenario A, B, C, and D. For Scenario A: the parcel remains near the ground; B, C and D: the parcel ascends after 2 hours, 6 hours and 10 hours respectively.**

11. Figure 2: How is kappa for the population derived from the kappa\_i (i.e., weighted by the particle mass?)?

The representative kappa value  $\kappa_m$  for the population is determined by calculating the median  $\kappa_i$  value of all particles. As a result, the method relies on particle number counts rather than mass.

Due to the nature of the model, each output computational particle is associated with a number concentration. When calculating the median and the 25th and 75th percentiles, we also considered using the number concentration as a weighting factor.

12. How was the composition averaging done – over the whole population, or within certain size ranges, e.g., fine and coarse? A size-resolved treatment could be interesting because the error probably comes from a narrow size range (which also depends on supersaturation).

The composition averaging was done over the whole population. We statistically aggregated the chemical compositions of all particles, assuming each aerosol population exists as a totally internal mixture. We have added some explanations in lines 353~354:

*“Due to measurement limitations on aerosol components, the hygroscopicity of individual particles is often estimated using the average chemical composition of the total aerosol population, which is based on the fully internal mixing assumption.”*

We sincerely appreciate your valuable suggestions. The size-resolved perspective proves particularly insightful: neglecting mixing state effects may substantially influence particles within specific size regimes. We have implemented a logarithmic size binning (5 categories) approach and conducted corresponding parametric analysis, with results comprehensively detailed in Figure 6 of the revised manuscript. We have restructured Section 4 to enhance clarity and logical flow. The newly added content, which addresses these critical aspects, is presented below:

*“4.2 CCN calculation error analysis from size-resolved perspective*

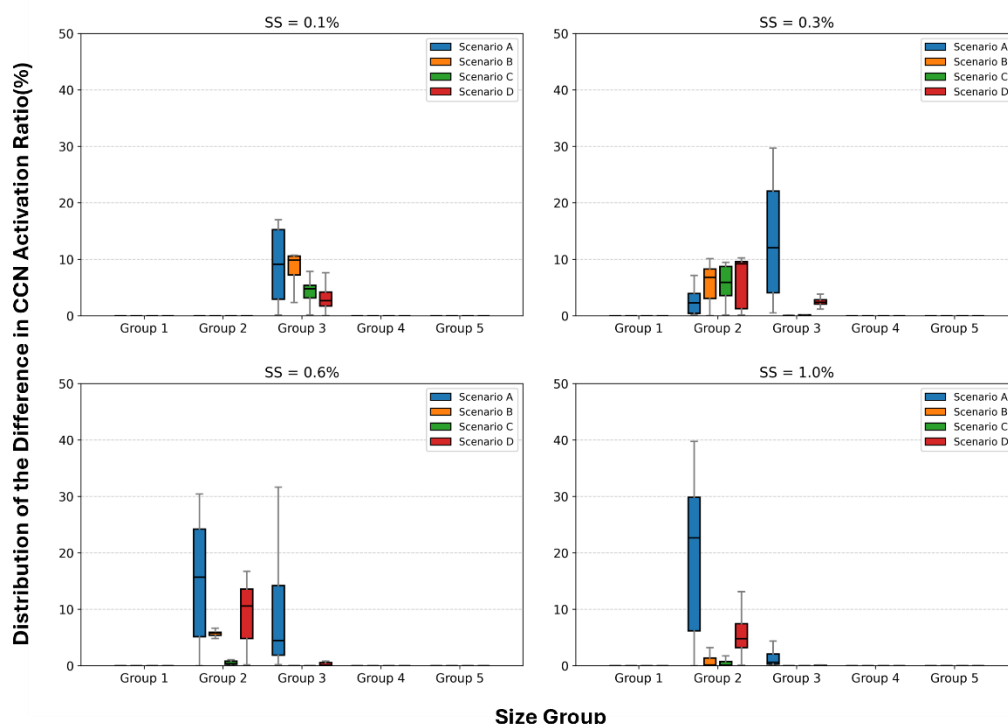

**Figure 6. The difference in CCN activation between composition-averaged and particle-resolved approaches within 5 logarithmic size bins ( $10^{-3} \sim 10^2 \mu\text{m}$ ) at various environmental supersaturations for four scenarios. Boxplots show 25<sup>th</sup>–75<sup>th</sup> percentiles (with median line); data comes from ten-minute intervals over the simulation.**

*Furthermore, the aerosol population is divided into 5 logarithmically spaced size bins (from 1 to  $10^5 \text{ nm}$ )*



to provide a more detailed analysis of the CCN prediction error from size-resolved perspective, as shown in Fig. 6. Here, the composition-averaged method was performed separately within each size bin. The results aggregate data from the entire 24 hours at 10-minute intervals. They are also analyzed under four supersaturations, corresponding to Fig. 5. The boxplots represent the interquartile range (25<sup>th</sup>–75<sup>th</sup>) and horizontal lines indicate medians. It can be seen that, in the smallest size bin (Group 1) and the larger size bins (Groups 4 and 5), although the hygroscopicity parameters calculated by the two methods differ, particle activation is primarily determined by size rather than hygroscopicity. Therefore, under varying supersaturation levels, the sources of error are mainly concentrated in Group 2 (10~100 nm) and Group 3 (100~1000 nm), which also account for the highest particle number concentrations. Compared to Group 2, the originally inactivated aerosols in the larger size bin (Group 3) are more likely to transition to an activated state as supersaturation increases. Consequently, the distribution of the CCN activation error caused by the composition-averaged method in Group 3 decreases with increasing supersaturation. This underscores the importance of accurately determining the specific composition of particles to obtain more precise results. The deviation from the assumption of uniform mixing emphasizes the importance of employing accurate measurement techniques or particle-resolved models like PartMC-MOSAIC, which can capture the real mixing state of aerosol particles. Such techniques can provide a more comprehensive understanding of the impact of the size distribution, chemical composition, and mixing state of the aerosols, thereby improving the accuracy of hygroscopicity calculations and related predictions.”

13. Figure 5, y-axis, suggest to display error in percent rather than as a fraction.

According to your helpful suggestions, we have made modifications to Figure 5. Based on these changes, the discussion in section 4.1 is restructured as well. The new figures are pasted below:

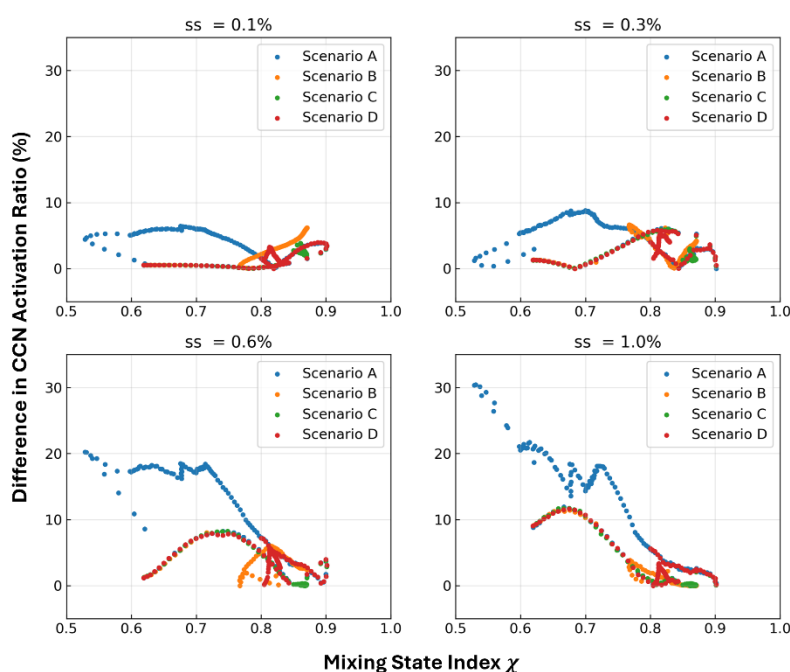

Figure 5. The difference in CCN activation between composition-averaging and particle-resolved results with the mixing state index  $\chi$  at various environmental supersaturations for four scenarios. The scatters show the results at ten-minute intervals.
